# Supplementary material for: Examining supporting and constraining factors of physicians’ acceptance of telemedical online consultations: a survey study
Source: Springer Nature journal article supplement (doi:10.1186/s12913-023-10032-6), 2023-10-19
Supplement: MOESM2 [file 26202144]

## Additional File 2: Questionnaire Guide

1. Which professional group do you belong to?

|                      |            |
|----------------------|------------|
| General Practitioner | Specialist |
|----------------------|------------|

2. If Specialist is selected, please provide your specialty.

|  |
|--|
|  |
|--|

3. Please provide your age.

|  |
|--|
|  |
|--|

4. Please select your gender.

|        |      |
|--------|------|
| Female | Male |
|--------|------|

5. How many years have you been working in your profession?

|  |
|--|
|  |
|--|

Please answer the following questions:

6. I intend to use online consultations in the future.

|                   |          |                   |         |                |       |                |
|-------------------|----------|-------------------|---------|----------------|-------|----------------|
| Strongly Disagree | Disagree | Somewhat Disagree | Neutral | Somewhat Agree | Agree | Strongly Agree |
|-------------------|----------|-------------------|---------|----------------|-------|----------------|

7. I plan to use online consultations in the future.

|                   |          |                   |         |                |       |                |
|-------------------|----------|-------------------|---------|----------------|-------|----------------|
| Strongly Disagree | Disagree | Somewhat Disagree | Neutral | Somewhat Agree | Agree | Strongly Agree |
|-------------------|----------|-------------------|---------|----------------|-------|----------------|

8. Using online consultations could increase healthcare for patients in old people's homes and nursing homes.

|                   |          |                   |         |                |       |                |
|-------------------|----------|-------------------|---------|----------------|-------|----------------|
| Strongly Disagree | Disagree | Somewhat Disagree | Neutral | Somewhat Agree | Agree | Strongly Agree |
|-------------------|----------|-------------------|---------|----------------|-------|----------------|

9. Online consultations would be a useful extension of existing treatment methods.

|                   |          |                   |         |                |       |                |
|-------------------|----------|-------------------|---------|----------------|-------|----------------|
| Strongly Disagree | Disagree | Somewhat Disagree | Neutral | Somewhat Agree | Agree | Strongly Agree |
|-------------------|----------|-------------------|---------|----------------|-------|----------------|

10. I expect online consultations to be easy to understand and use.

|                   |          |                   |         |                |       |                |
|-------------------|----------|-------------------|---------|----------------|-------|----------------|
| Strongly Disagree | Disagree | Somewhat Disagree | Neutral | Somewhat Agree | Agree | Strongly Agree |
|-------------------|----------|-------------------|---------|----------------|-------|----------------|

11. I expect to find online consultations easy to use.

|                   |          |                   |         |                |       |                |
|-------------------|----------|-------------------|---------|----------------|-------|----------------|
| Strongly Disagree | Disagree | Somewhat Disagree | Neutral | Somewhat Agree | Agree | Strongly Agree |
|-------------------|----------|-------------------|---------|----------------|-------|----------------|

12. I think my colleagues would support the use of online consultations.

|                   |          |                   |         |                |       |                |
|-------------------|----------|-------------------|---------|----------------|-------|----------------|
| Strongly Disagree | Disagree | Somewhat Disagree | Neutral | Somewhat Agree | Agree | Strongly Agree |
|-------------------|----------|-------------------|---------|----------------|-------|----------------|

13. I think our patients would support the use of online consultations.

|                   |          |                   |         |                |       |                |
|-------------------|----------|-------------------|---------|----------------|-------|----------------|
| Strongly Disagree | Disagree | Somewhat Disagree | Neutral | Somewhat Agree | Agree | Strongly Agree |
|-------------------|----------|-------------------|---------|----------------|-------|----------------|

14. National security standards for the handling of patients' medical data are necessary.

|                   |          |                   |         |                |       |                |
|-------------------|----------|-------------------|---------|----------------|-------|----------------|
| Strongly Disagree | Disagree | Somewhat Disagree | Neutral | Somewhat Agree | Agree | Strongly Agree |
|-------------------|----------|-------------------|---------|----------------|-------|----------------|

15. Committing standards for the handling of patients' medical data are necessary for my practice.

|                   |          |                   |         |                |       |                |
|-------------------|----------|-------------------|---------|----------------|-------|----------------|
| Strongly Disagree | Disagree | Somewhat Disagree | Neutral | Somewhat Agree | Agree | Strongly Agree |
|-------------------|----------|-------------------|---------|----------------|-------|----------------|

16. It's important to me to be able to extensively inform my patients about the use of their medical data.

|                   |          |                   |         |                |       |                |
|-------------------|----------|-------------------|---------|----------------|-------|----------------|
| Strongly Disagree | Disagree | Somewhat Disagree | Neutral | Somewhat Agree | Agree | Strongly Agree |
|-------------------|----------|-------------------|---------|----------------|-------|----------------|

17. Using online consultations is compatible with the way I want to work with patient data.

|                   |          |                   |         |                |       |                |
|-------------------|----------|-------------------|---------|----------------|-------|----------------|
| Strongly Disagree | Disagree | Somewhat Disagree | Neutral | Somewhat Agree | Agree | Strongly Agree |
|-------------------|----------|-------------------|---------|----------------|-------|----------------|

18. I think that using online consultations fits well with the way I like to interact with my colleagues.

|                   |          |                   |         |                |       |                |
|-------------------|----------|-------------------|---------|----------------|-------|----------------|
| Strongly Disagree | Disagree | Somewhat Disagree | Neutral | Somewhat Agree | Agree | Strongly Agree |
|-------------------|----------|-------------------|---------|----------------|-------|----------------|

19. Using online consultations fits into my work style.

|                   |          |                   |         |                |       |                |
|-------------------|----------|-------------------|---------|----------------|-------|----------------|
| Strongly Disagree | Disagree | Somewhat Disagree | Neutral | Somewhat Agree | Agree | Strongly Agree |
|-------------------|----------|-------------------|---------|----------------|-------|----------------|

20. Working with a tablet makes me nervous.

|                   |          |                   |         |                |       |                |
|-------------------|----------|-------------------|---------|----------------|-------|----------------|
| Strongly Disagree | Disagree | Somewhat Disagree | Neutral | Somewhat Agree | Agree | Strongly Agree |
|-------------------|----------|-------------------|---------|----------------|-------|----------------|

21. I feel threatened when others talk about tablets.

|                   |          |                   |         |                |       |                |
|-------------------|----------|-------------------|---------|----------------|-------|----------------|
| Strongly Disagree | Disagree | Somewhat Disagree | Neutral | Somewhat Agree | Agree | Strongly Agree |
|-------------------|----------|-------------------|---------|----------------|-------|----------------|

22. Tablets make me feel uncomfortable.

|                   |          |                   |         |                |       |                |
|-------------------|----------|-------------------|---------|----------------|-------|----------------|
| Strongly Disagree | Disagree | Somewhat Disagree | Neutral | Somewhat Agree | Agree | Strongly Agree |
|-------------------|----------|-------------------|---------|----------------|-------|----------------|

23. I get a sinking feeling when I think of trying to use a tablet.

|                   |          |                   |         |                |       |                |
|-------------------|----------|-------------------|---------|----------------|-------|----------------|
| Strongly Disagree | Disagree | Somewhat Disagree | Neutral | Somewhat Agree | Agree | Strongly Agree |
|-------------------|----------|-------------------|---------|----------------|-------|----------------|

24. Tablets make me feel uneasy.

|                   |          |                   |         |                |       |                |
|-------------------|----------|-------------------|---------|----------------|-------|----------------|
| Strongly Disagree | Disagree | Somewhat Disagree | Neutral | Somewhat Agree | Agree | Strongly Agree |
|-------------------|----------|-------------------|---------|----------------|-------|----------------|
